# Supplementary material for: Structural diversity, magnetic property, or luminescence sensing of Co(ii) and Cd(ii) coordination polymers derived from designed 3,3′-((5-carboxy-1,3-phenylene)bis(oxy))dibenzoic acid
Source: Royal Society of Chemistry journal article supplement (doi:10.1039/c9dt01736d), 2019-01-01
Supplement: c9dt01736d1.pdf [file c9dt01736d1.pdf]

## Supporting Information

### Structural diversity, magnetic property, or luminescence sensing of Co(II) and Cd(II) coordination polymers derived from designed 3,3'-((5-carboxy-1,3-phenylene)bis(oxy))dibenzoic acid

Dong-Dong Yang<sup>a</sup>, Li-Ping Lu<sup>\*a</sup>, Miao-Li Zhu<sup>\*a, b</sup>

<sup>a</sup> Institute of Molecular Science, Key Laboratory of Chemical Biology and Molecular Engineering of the Education Ministry, Shanxi University, Taiyuan, Shanxi 030006, People's Republic of China.

[luliping@sxu.edu.cn](mailto:luliping@sxu.edu.cn). <sup>b</sup> Key Laboratory of Materials for Energy Conversion and Storage of Shanxi Province; Shanxi University, Taiyuan, Shanxi 030006, People's Republic of China.

[miaoli@sxu.edu.cn](mailto:miaoli@sxu.edu.cn)

**Tables S1.** Selected bond lengths [Å] and angles [°] for complexes 1-5.

Complex 1

|                                      |             |                                      |             |
|--------------------------------------|-------------|--------------------------------------|-------------|
| Co1—O4                               | 2.050 (3)   | Co2—O1 <sup>i</sup>                  | 2.030 (2)   |
| Co1—O2                               | 2.054 (2)   | Co2—O1                               | 2.030 (2)   |
| Co1—O5                               | 2.090 (2)   | Co2—O3 <sup>i</sup>                  | 2.067 (3)   |
| Co1—N1                               | 2.125 (3)   | Co2—O3                               | 2.067 (2)   |
| Co1—N2                               | 2.133 (3)   | Co2—O9 <sup>i</sup>                  | 2.199 (2)   |
| Co1—O9                               | 2.188 (2)   | Co2—O9                               | 2.199 (2)   |
| O4—Co1—O2                            | 94.67 (10)  | O5—Co1—N2                            | 91.06 (10)  |
| O4—Co1—O5                            | 86.31 (10)  | N1—Co1—N2                            | 76.16 (11)  |
| O2—Co1—O5                            | 177.53 (10) | O4—Co1—O9                            | 89.54 (9)   |
| O4—Co1—N1                            | 91.46 (11)  | O2—Co1—O9                            | 88.78 (9)   |
| O2—Co1—N1                            | 88.05 (10)  | O5—Co1—O9                            | 88.96 (8)   |
| O5—Co1—N1                            | 94.20 (10)  | N1—Co1—O9                            | 176.74 (10) |
| O4—Co1—N2                            | 167.14 (10) | N2—Co1—O9                            | 103.01 (10) |
| O2—Co1—N2                            | 88.47 (10)  | O1 <sup>i</sup> —Co2—O1              | 180.0       |
| O1 <sup>i</sup> —Co2—O3 <sup>i</sup> | 89.47 (11)  | O3 <sup>i</sup> —Co2—O9 <sup>i</sup> | 95.83 (9)   |
| O1—Co2—O3 <sup>i</sup>               | 90.53 (11)  | O3—Co2—O9 <sup>i</sup>               | 84.17 (9)   |
| O1 <sup>i</sup> —Co2—O3              | 90.53 (11)  | O1 <sup>i</sup> —Co2—O9              | 87.97 (9)   |
| O1—Co2—O3                            | 89.47 (11)  | O1—Co2—O9                            | 92.03 (9)   |
| O3 <sup>i</sup> —Co2—O3              | 180.0       | O3 <sup>i</sup> —Co2—O9              | 84.17 (9)   |

|                                      |           |                         |           |
|--------------------------------------|-----------|-------------------------|-----------|
| O1 <sup>i</sup> —Co2—O9 <sup>i</sup> | 92.03 (9) | O3—Co2—O9               | 95.83 (9) |
| O1—Co2—O9 <sup>i</sup>               | 87.97 (9) | O9 <sup>i</sup> —Co2—O9 | 180.0     |
| C7—O1—Co2                            | 138.3 (2) |                         |           |

Complex 2

|                                          |             |                                          |             |
|------------------------------------------|-------------|------------------------------------------|-------------|
| Co1—O5 <sup>i</sup>                      | 2.009 (2)   | Co2—N3                                   | 2.076 (3)   |
| Co1—O5                                   | 2.009 (2)   | Co2—N2 <sup>ii</sup>                     | 2.100 (3)   |
| Co1—O9 <sup>i</sup>                      | 2.134 (2)   | Co2—O2 <sup>iii</sup>                    | 2.128 (2)   |
| Co1—O9                                   | 2.134 (2)   | Co2—O1 <sup>iii</sup>                    | 2.165 (3)   |
| Co1—N1                                   | 2.189 (3)   | Co2—O8                                   | 2.332 (3)   |
| Co1—N1 <sup>i</sup>                      | 2.189 (3)   | Co2—C7 <sup>iii</sup>                    | 2.479 (4)   |
| Co2—O7                                   | 2.036 (2)   | O9—Co1—N1                                | 87.68 (9)   |
| O5 <sup>i</sup> —Co1—O5                  | 180.0       | O5 <sup>i</sup> —Co1—N1 <sup>i</sup>     | 89.94 (10)  |
| O5 <sup>i</sup> —Co1—O9 <sup>i</sup>     | 90.93 (10)  | O5—Co1—N1 <sup>i</sup>                   | 90.06 (10)  |
| O5—Co1—O9 <sup>i</sup>                   | 89.06 (10)  | O9 <sup>i</sup> —Co1—N1 <sup>i</sup>     | 87.68 (9)   |
| O5 <sup>i</sup> —Co1—O9                  | 89.07 (10)  | O9—Co1—N1 <sup>i</sup>                   | 92.32 (9)   |
| O5—Co1—O9                                | 90.94 (10)  | N1—Co1—N1 <sup>i</sup>                   | 180.00 (9)  |
| O9 <sup>i</sup> —Co1—O9                  | 180.0       | O7—Co2—N3                                | 94.41 (12)  |
| O5 <sup>i</sup> —Co1—N1                  | 90.06 (10)  | O7—Co2—N2 <sup>ii</sup>                  | 101.69 (11) |
| O5—Co1—N1                                | 89.94 (10)  | N3—Co2—N2 <sup>ii</sup>                  | 98.02 (12)  |
| O9 <sup>i</sup> —Co1—N1                  | 92.32 (9)   | O9—Co1—N1                                | 87.68 (9)   |
| O7—Co2—O2 <sup>iii</sup>                 | 156.54 (11) | O7—Co2—O8                                | 59.47 (11)  |
| N3—Co2—O2 <sup>iii</sup>                 | 94.96 (11)  | N3—Co2—O8                                | 151.37 (11) |
| N2 <sup>ii</sup> —Co2—O2 <sup>iii</sup>  | 98.23 (10)  | N2 <sup>ii</sup> —Co2—O8                 | 98.69 (11)  |
| O7—Co2—O1 <sup>iii</sup>                 | 97.93 (10)  | O2 <sup>iii</sup> —Co2—O8                | 105.43 (10) |
| N3—Co2—O1 <sup>iii</sup>                 | 88.90 (12)  | O1 <sup>iii</sup> —Co2—O8                | 83.91 (11)  |
| N2 <sup>ii</sup> —Co2—O1 <sup>iii</sup>  | 158.58 (10) | O7—Co2—C7 <sup>iii</sup>                 | 127.69 (11) |
| O2 <sup>iii</sup> —Co2—O1 <sup>iii</sup> | 60.84 (9)   | N3—Co2—C7 <sup>iii</sup>                 | 90.26 (13)  |
| N2 <sup>ii</sup> —Co2—C7 <sup>iii</sup>  | 129.16 (11) | O1 <sup>iii</sup> —Co2—C7 <sup>iii</sup> | 30.01 (10)  |
| O2 <sup>iii</sup> —Co2—C7 <sup>iii</sup> | 30.93 (10)  | O8—Co2—C7 <sup>iii</sup>                 | 96.95 (12)  |

Complex 3

|                       |           |        |           |
|-----------------------|-----------|--------|-----------|
| Co1—O6 <sup>ii</sup>  | 2.049 (4) | Co1—N5 | 2.145 (6) |
| Co1—O5                | 2.084 (5) | Co1—N1 | 2.142 (5) |
| Co1—N4 <sup>iii</sup> | 2.122 (5) | Co1—O9 | 2.284 (5) |

|                                         |             |                           |             |
|-----------------------------------------|-------------|---------------------------|-------------|
| C33—N4—C32                              | 105.2 (6)   | N3—C33—H33                | 123.7       |
| C33—N4—Co1 <sup>i</sup>                 | 127.5 (5)   | C31—C32—N4                | 110.0 (7)   |
| C32—N4—Co1 <sup>i</sup>                 | 127.4 (5)   | C31—C32—H32               | 125.0       |
| N4—C33—N3                               | 112.6 (6)   | N4—C32—H32                | 125.0       |
| N4—C33—H33                              | 123.7       | O6 <sup>ii</sup> —Co1—O5  | 107.94 (18) |
| O6 <sup>ii</sup> —Co1—N4 <sup>iii</sup> | 89.6 (2)    | O5—Co1—N1                 | 87.53 (19)  |
| O5—Co1—N4 <sup>iii</sup>                | 92.3 (2)    | N4 <sup>iii</sup> —Co1—N1 | 179.2 (2)   |
| O6 <sup>ii</sup> —Co1—N5                | 165.18 (19) | N5—Co1—N1                 | 87.7 (2)    |
| O5—Co1—N5                               | 86.5 (2)    | O6 <sup>ii</sup> —Co1—O9  | 83.77 (18)  |
| N4 <sup>iii</sup> —Co1—N5               | 93.1 (2)    | O5—Co1—O9                 | 168.20 (18) |
| O6 <sup>ii</sup> —Co1—N1                | 89.66 (19)  | O5—Co1—N1                 | 87.53 (19)  |
| N4 <sup>iii</sup> —Co1—O9               | 89.1 (2)    | N1—Co1—O9                 | 91.2 (2)    |
| N5—Co1—O9                               | 81.7 (2)    |                           |             |

#### Complex 4

|                                       |             |                                         |             |
|---------------------------------------|-------------|-----------------------------------------|-------------|
| Cd1—O2                                | 2.2923 (11) | Cd1—N4 <sup>ii</sup>                    | 2.3548 (13) |
| Cd1—N1                                | 2.3079 (12) | Cd1—O4 <sup>iii</sup>                   | 2.3947 (12) |
| Cd1—O4 <sup>i</sup>                   | 2.3195 (11) | Cd1—O1                                  | 2.5770 (13) |
| O2—Cd1—N1                             | 95.32 (5)   | N4 <sup>ii</sup> —Cd1—O4 <sup>iii</sup> | 83.95 (5)   |
| O2—Cd1—O4 <sup>i</sup>                | 125.50 (4)  | O2—Cd1—O1                               | 53.25 (4)   |
| N1—Cd1—O4 <sup>i</sup>                | 106.50 (4)  | N1—Cd1—O1                               | 80.44 (5)   |
| O2—Cd1—N4 <sup>ii</sup>               | 82.43 (5)   | O4 <sup>i</sup> —Cd1—O1                 | 173.02 (4)  |
| N1—Cd1—N4 <sup>ii</sup>               | 171.63 (4)  | N4 <sup>ii</sup> —Cd1—O1                | 91.83 (5)   |
| O4 <sup>i</sup> —Cd1—N4 <sup>ii</sup> | 81.21 (5)   | O4 <sup>iii</sup> —Cd1—O1               | 103.40 (4)  |
| O2—Cd1—O4 <sup>iii</sup>              | 152.31 (4)  | O4 <sup>i</sup> —Cd1—O4 <sup>iii</sup>  | 75.62 (4)   |
| N1—Cd1—O4 <sup>iii</sup>              | 94.69 (4)   |                                         |             |

#### Complex 5

|           |            |                     |            |
|-----------|------------|---------------------|------------|
| Cd1—O4    | 2.235 (2)  | Cd2—O1 <sup>i</sup> | 2.218 (2)  |
| Cd1—O2    | 2.239 (2)  | Cd2—O1              | 2.218 (2)  |
| Cd1—O5    | 2.284 (2)  | Cd2—O3              | 2.252 (3)  |
| Cd1—N1    | 2.328 (3)  | Cd2—O3 <sup>i</sup> | 2.252 (3)  |
| Cd1—O9    | 2.343 (2)  | Cd2—O9              | 2.396 (2)  |
| Cd1—N2    | 2.345 (3)  | Cd2—O9 <sup>i</sup> | 2.396 (2)  |
| O4—Cd1—O2 | 91.48 (10) | N1—Cd1—O9           | 169.19 (9) |

|                                      |            |                                      |             |
|--------------------------------------|------------|--------------------------------------|-------------|
| O4—Cd1—O5                            | 82.98 (11) | O4—Cd1—N2                            | 162.59 (10) |
| O2—Cd1—O5                            | 172.70 (9) | O2—Cd1—N2                            | 94.98 (9)   |
| O4—Cd1—N1                            | 92.07 (10) | O5—Cd1—N2                            | 91.68 (10)  |
| O2—Cd1—N1                            | 90.44 (10) | N1—Cd1—N2                            | 71.77 (10)  |
| O5—Cd1—N1                            | 94.50 (9)  | O9—Cd1—N2                            | 97.80 (9)   |
| O4—Cd1—O9                            | 97.93 (9)  | O1 <sup>i</sup> —Cd2—O1              | 180.0       |
| O2—Cd1—O9                            | 93.39 (9)  | O1 <sup>i</sup> —Cd2—O3              | 89.05 (11)  |
| O5—Cd1—O9                            | 82.71 (8)  | O1—Cd2—O3                            | 90.95 (11)  |
| O1—Cd2—O3 <sup>i</sup>               | 89.05 (11) | O3—Cd2—O9                            | 100.03 (9)  |
| O3—Cd2—O3 <sup>i</sup>               | 180.0      | O3 <sup>i</sup> —Cd2—O9              | 79.97 (9)   |
| O1 <sup>i</sup> —Cd2—O9              | 85.56 (9)  | O1 <sup>i</sup> —Cd2—O9 <sup>i</sup> | 94.44 (9)   |
| O1—Cd2—O9                            | 94.44 (9)  | O1—Cd2—O9 <sup>i</sup>               | 85.56 (9)   |
| O3 <sup>i</sup> —Cd2—O9 <sup>i</sup> | 100.03 (9) | O9—Cd2—O9 <sup>i</sup>               | 180.00 (4)  |

Symmetry codes: for complex1: (i)  $-x+1/2, -y+1/2, -z+1$ ; (ii)  $x, -y+1, z-1/2$ ; (iii)  $x, -y+1, z+1/2$ . for complex 2: (i)  $-x+2, -y, -z$ ; (ii)  $-x+1, y+1/2, -z+3/2$ ; (iii)  $-x+1, y-1/2, -z+3/2$ ; (iv)  $-x+1, -y, -z+3$ . for complex 3: (i)  $x, y-1, z$ ; (ii)  $-x+1, -y+1, -z+1$ ; (iii)  $x, y+1, z$ ; (iv)  $-x, -y, -z$ . for complex 4: (i)  $x+1, y+1, z+1$ ; (ii)  $x+1, y, z+1$ ; (iii)  $-x+1, -y, -z+2$ ; (iv)  $x-1, y, z-1$ ; (v)  $x-1, y-1, z-1$ . for complex 5: (i)  $-x+1/2, -y+1/2, -z+1$ ; (ii)  $x, -y+1, z-1/2$ ; (iii)  $x, -y+1, z+1/2$ .

**Tables S2.** Hydrogen bonds in crystal packing [ $\text{\AA}, ^\circ$ ] of complexes 1-3.

| Complex  | $D-H\cdots A$                   | $D-H$ | $H\cdots A$ | $D\cdots A$ | $D-H\cdots A$ |
|----------|---------------------------------|-------|-------------|-------------|---------------|
| Complex1 | C6—H6 $\cdots$ O6 <sup>i</sup>  | 0.93  | 2.70        | 3.584 (4)   | 160           |
| Complex4 | O7—H7A $\cdots$ O1 <sup>i</sup> | 0.82  | 1.80        | 2.6102 (17) | 171           |
| Complex5 | O9—H9A $\cdots$ O6              | 0.84  | 1.74        | 2.511 (3)   | 152           |

Symmetry codes: for complex1: (i)  $-x+1/2, -y+1/2, -z+1$ . for complex 4: (i)  $x+1, y, z$ .

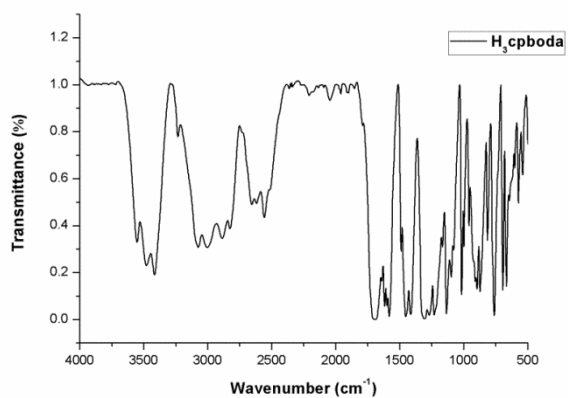

(a)

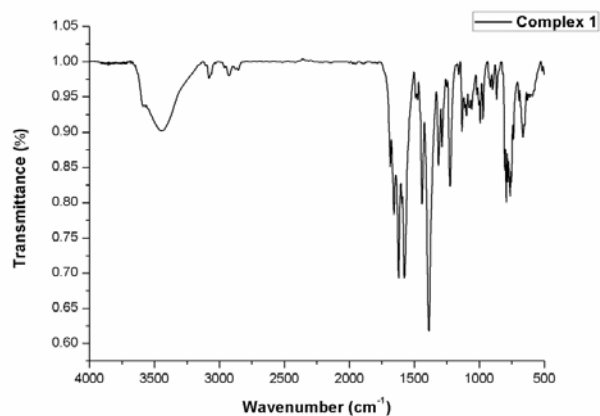

(b)

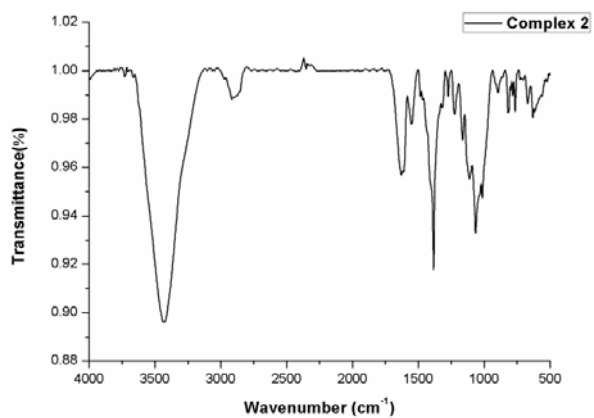

(c)

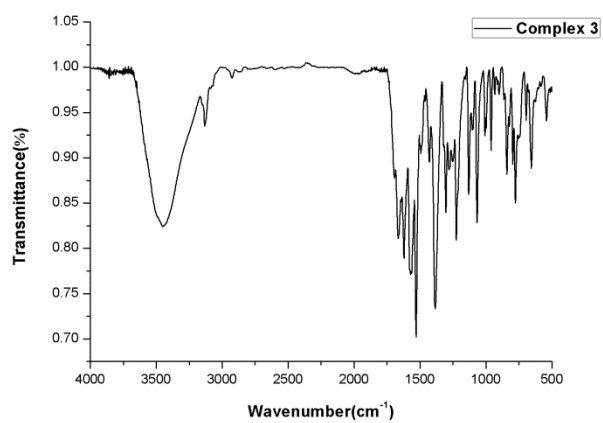

(d)

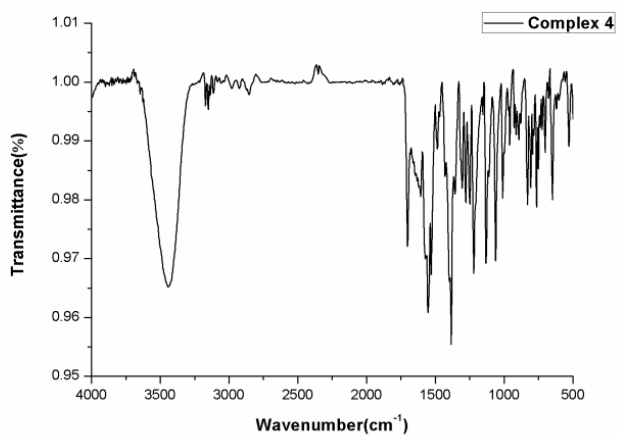

(e)

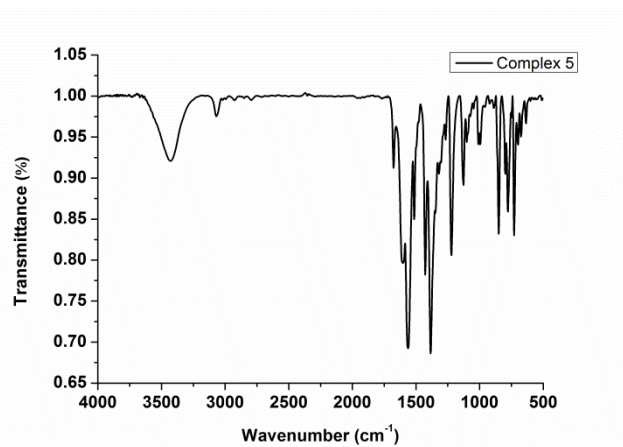

(f)

**Fig. S1** The IR spectra of  $H_3cpboda$  ligand and complexes 1-5.

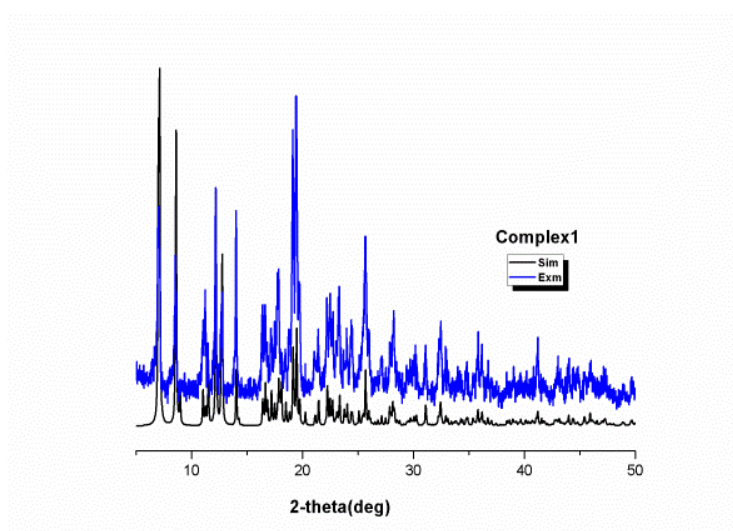

(a)

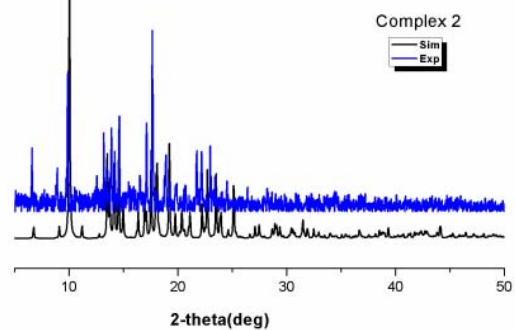

(b)

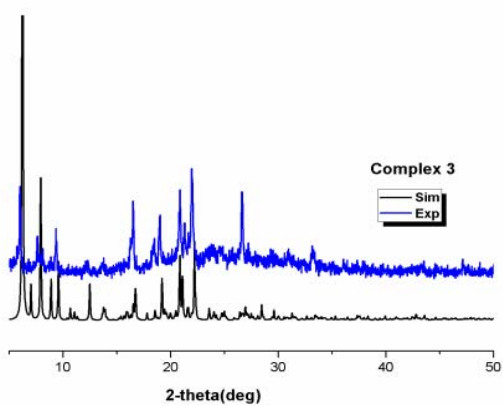

(c)

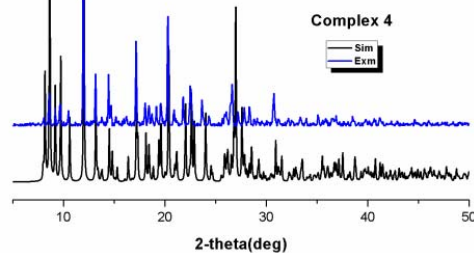

(d)

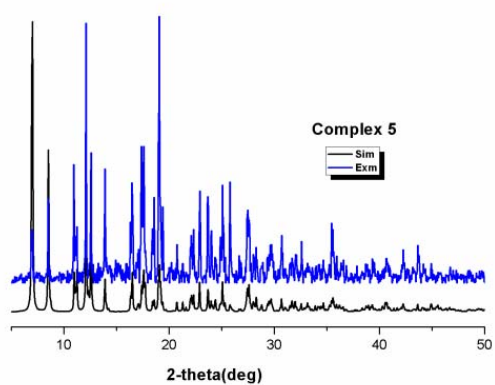

(e)

**Fig. S2** PXRD patterns of complexes **1–5** at room temperature. Blue patterns correspond to the experimental data obtained using the as-synthesized bulk samples. Black patterns were simulated from the single crystal X-ray data.

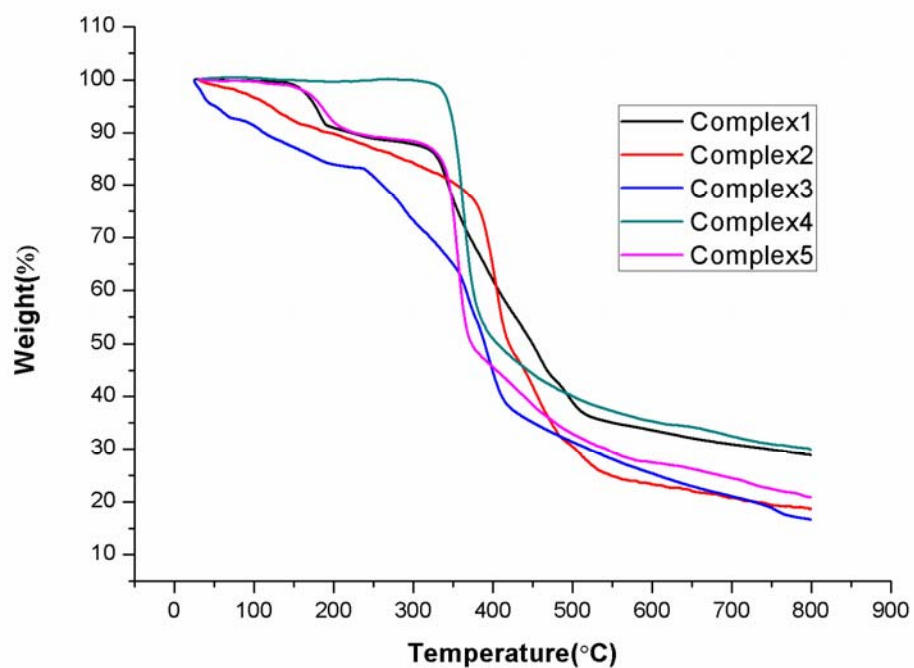

**Fig. S3** The thermal curves of complexes 1-5.

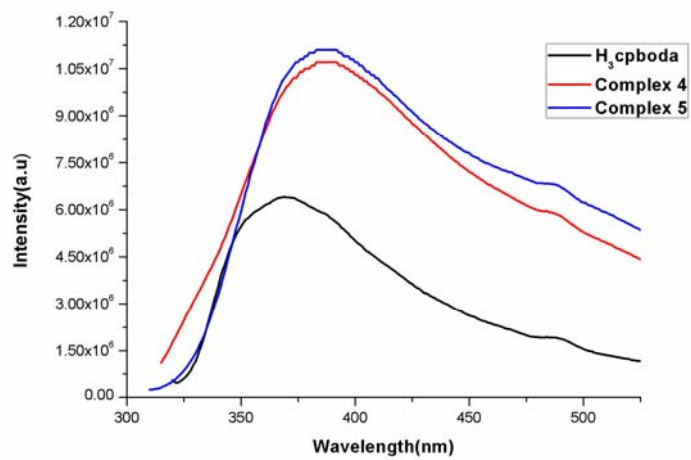

**Fig. S4** The solid-state emission spectra of 4 and 5 as well as H<sub>3</sub>cpboda at room temperature

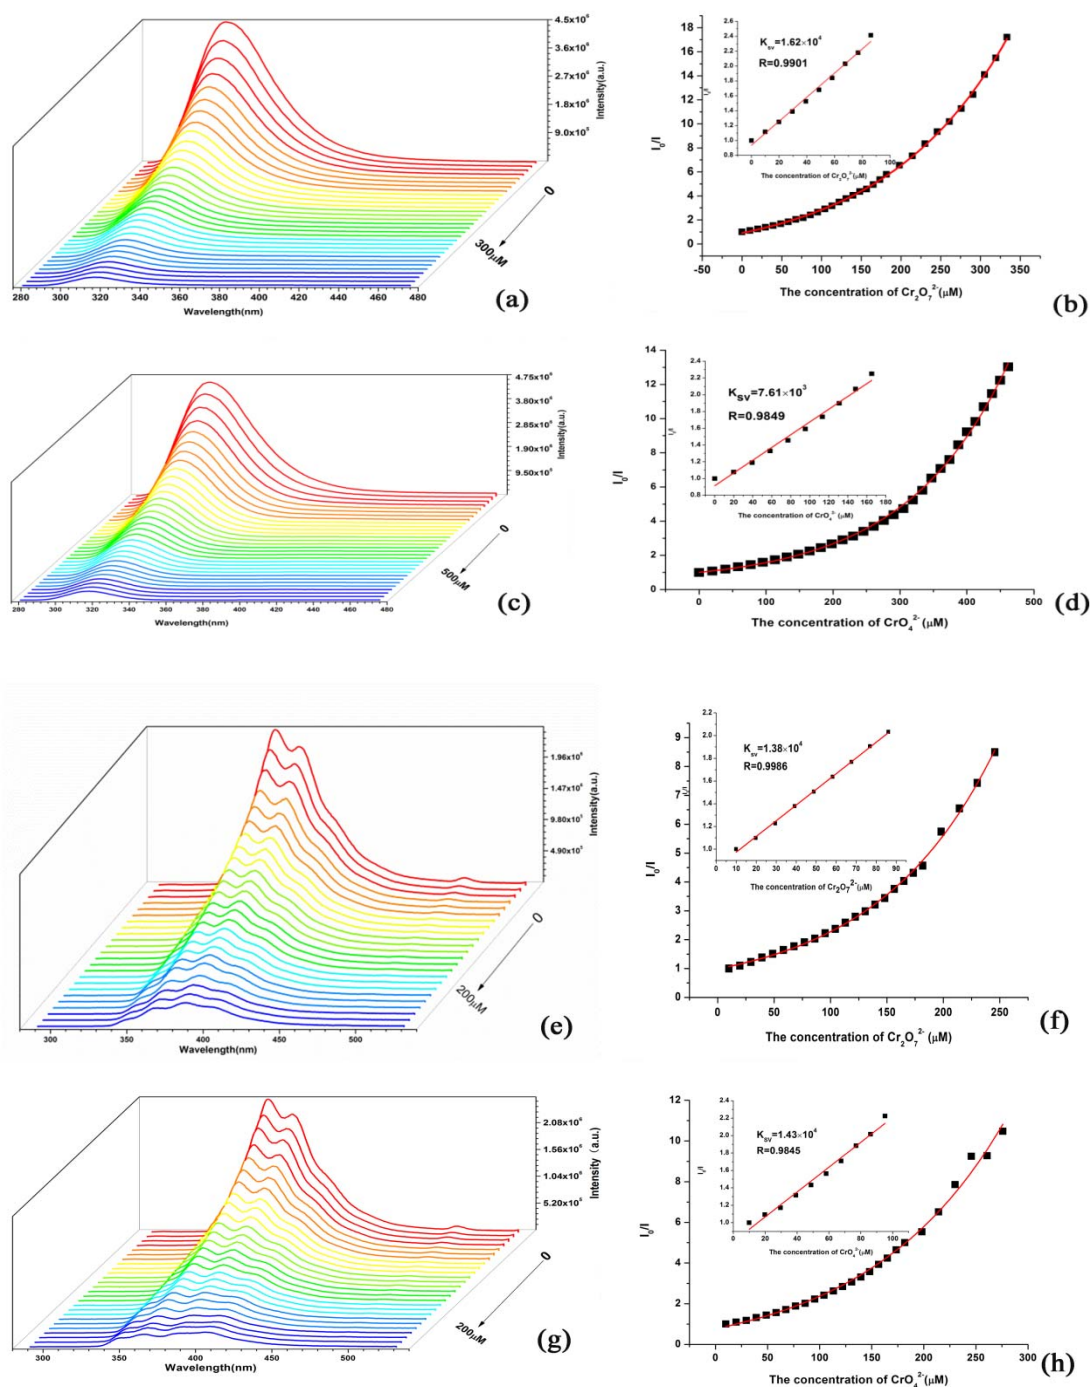

**Fig S5** (a) Luminescence responses of **4** (2.00 mg dispersed in 2.00 mL of water) toward different concentrations of  $\text{Cr}_2\text{O}_7^{2-}$  in water, (b) Luminescence responses of **4** toward different concentrations of  $\text{CrO}_4^{2-}$  in water, (e) Luminescence responses of **5** (2.00 mg dispersed in 2.00 mL of water) toward different concentrations of  $\text{Cr}_2\text{O}_7^{2-}$  in water, Luminescence responses of **5** toward different concentrations of  $\text{CrO}_4^{2-}$  in water, (b) Stern–Volmer plot of  $I_0/I$  versus  $\text{Cr}_2\text{O}_7^{2-}$  concentration in an aqueous suspension of **4**. (d) Stern–Volmer plot of  $I_0/I$  versus  $\text{CrO}_4^{2-}$  concentration in an aqueous suspension of **4**. (f) Stern–Volmer plot of  $I_0/I$  versus  $\text{Cr}_2\text{O}_7^{2-}$  concentration in an aqueous suspension of **5**. (h) Stern–Volmer plot of  $I_0/I$  versus  $\text{CrO}_4^{2-}$  concentration in an aqueous suspension of **5**.



## Section S1: Calculation of Detection Limit for $\text{Cr}_2\text{O}_7^{2-}$ and $\text{CrO}_4^{2-}$

In a typical experiment to determine limit of detection, incremental amount of 0.001 M aqueous  $\text{Cr}_2\text{O}_7^{2-}/\text{CrO}_4^{2-}$  solution in the volume ranging 0.0  $\mu\text{L}$  to 50  $\mu\text{L}$  was added to the water suspension (2 mg complexes **4** and **5** dispersed in 2 ml water, respectively). Fluorescence intensity thus observed for each incremental addition of aqueous  $\text{Cr}_2\text{O}_7^{2-}/\text{CrO}_4^{2-}$  solution was plotted against the respective increasing concentration of  $\text{Cr}_2\text{O}_7^{2-}/\text{CrO}_4^{2-}$ . Slope of the curve thus drawn was found to be  $\text{Cr}_2\text{O}_7^{2-} = 2.97 \times 10^4$  ( $R_2 = 0.980$ ) and  $\text{CrO}_4^{2-} = 2.09 \times 10^4$  ( $R_2 = 0.991$ ) for complex **4**,  $\text{Cr}_2\text{O}_7^{2-} = 2.15 \times 10^4$  ( $R_2 = 0.979$ ) and  $\text{CrO}_4^{2-} = 1.81 \times 10^4$  ( $R_2 = 0.993$ ) for complex **5**. Standard deviation ( $\sigma$ ) in the LOD determination for complexes **4** and **5** were calculated from five blank measurements for each LCP. Detection limit ( $\text{LOD} = 3\sigma/m$ ) was calculated as per an earlier report,<sup>S1,S2</sup> while the findings were tabulated ahead:

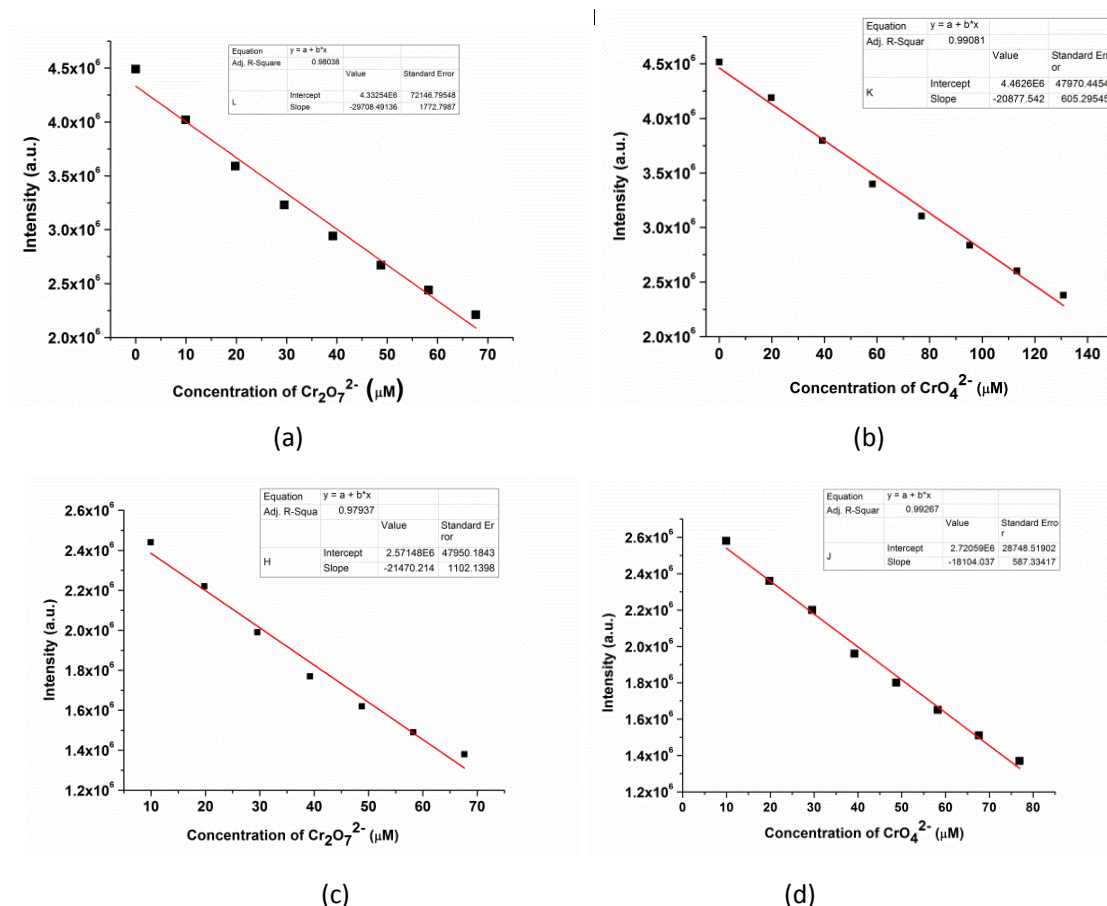

**Fig. S6** Linear region of fluorescence intensity suspensions in water upon incremental addition of  $\text{Cr}_2\text{O}_7^{2-}$  (a) and  $\text{CrO}_4^{2-}$  (b) in complex **4**,  $\text{Cr}_2\text{O}_7^{2-}$  (c) and  $\text{CrO}_4^{2-}$  (d) in complex **5**.

**Table S3** LOD calculations for  $\text{Cr}_2\text{O}_7^{2-}$  and  $\text{CrO}_4^{2-}$ 

|                                 |       | Complex 4                    |                        | Complex 5                    |                        |
|---------------------------------|-------|------------------------------|------------------------|------------------------------|------------------------|
|                                 | Blank | $\text{Cr}_2\text{O}_7^{2-}$ | $\text{CrO}_4^{2-}$    | $\text{Cr}_2\text{O}_7^{2-}$ | $\text{CrO}_4^{2-}$    |
| Fluorescence Intensity          | 1     | 4265900                      | 4339520                | 2087310                      | 2145350                |
|                                 | 2     | 4258610                      | 4338770                | 2092910                      | 2170480                |
|                                 | 3     | 4258440                      | 4280000                | 2054720                      | 2193360                |
|                                 | 4     | 4308690                      | 4311180                | 2126600                      | 2128070                |
|                                 | 5     | 4293060                      | 4329560                | 2128070                      | 2180680                |
| Standard deviation ( $\sigma$ ) |       | 22737.83                     | 27210.39               | 30559.27                     | 26552.59               |
| Slope (m)                       |       | 29708.49 $\mu\text{M}$       | 20877.54 $\mu\text{M}$ | 21470.21 $\mu\text{M}$       | 18104.04 $\mu\text{M}$ |
| Detection limit ( $3\sigma/m$ ) |       | 2.29 Mm                      | 3.91 $\mu\text{M}$     | 4.27 $\mu\text{M}$           | 4.40 $\mu\text{M}$     |

**Table S4** Comparison of various CPs sensors for the detection of  $\text{Cr}_2\text{O}_7^{2-}/\text{CrO}_4^{2-}$ .

|    | CPs-based fluorescent Materials                                                                                                    | Analyte                                          | Quenching constant ( $K_{SV}$ , $\text{M}^{-1}$ ) | Detection Limits (LOD, $\mu\text{M}$ ) | Media | Ref.      |
|----|------------------------------------------------------------------------------------------------------------------------------------|--------------------------------------------------|---------------------------------------------------|----------------------------------------|-------|-----------|
| 1  | $[\text{Zn}(\text{btz})]_n$                                                                                                        | $(\text{Cr}_2\text{O}_7^{2-}/\text{CrO}_4^{2-})$ | $4.23 \times 10^3$ ,<br>$3.19 \times 10^3$        | 2/10                                   | water | S3        |
| 2  | $[\text{Zn}(\text{ttz})\text{H}_2\text{O}]_n$                                                                                      | $(\text{Cr}_2\text{O}_7^{2-}/\text{CrO}_4^{2-})$ | $2.19 \times 10^3$ ,<br>$2.35 \times 10^3$        | 2/20                                   | water |           |
| 3  | $[\text{Zn}(\text{IPA})(\text{L})]_n$                                                                                              | $(\text{Cr}_2\text{O}_7^{2-}/\text{CrO}_4^{2-})$ | $1.37 \times 10^3$ ,<br>$1.0 \times 10^3$         | 12.0/18.3                              | water | S4        |
| 4  | $[\text{Cd}(\text{IPA})(\text{L})]_n$                                                                                              | $(\text{Cr}_2\text{O}_7^{2-}/\text{CrO}_4^{2-})$ | $2.91 \times 10^3$ ,<br>$1.20 \times 10^3$        | 2.26/2.52                              | water |           |
| 5  | $\{[\text{Eu}_2\text{L}_{1.5}(\text{H}_2\text{O})_2\text{EtOH}] \cdot \text{DMF}\}$                                                | $\text{Cr}_2\text{O}_7^{2-}$                     | $1.53 \times 10^3$                                | 10                                     | DMF   | S5        |
| 6  | $[\text{Zn}_2(\text{TPOM})(\text{NH}_2\text{-BDC})_2] \cdot 4\text{H}_2\text{O}$                                                   | $(\text{Cr}_2\text{O}_7^{2-}/\text{CrO}_4^{2-})$ | $7.59 \times 10^3$ ,<br>$4.45 \times 10^3$        | 3.9/4.8                                | DMF   | S6        |
| 7  | $\text{Eu}(\text{CBIP})(\text{HCOO})(\text{H}_2\text{O})_n$                                                                        | $(\text{Cr}_2\text{O}_7^{2-}/\text{CrO}_4^{2-})$ | $2.76 \times 10^3$ ,<br>$1.54 \times 10^3$        | 1.0/1.2                                | water | S7        |
| 8  | $[\text{Cd}(4\text{-tkpnb})(5\text{-tert-BIP A})]_n$                                                                               | $(\text{Cr}_2\text{O}_7^{2-}/\text{CrO}_4^{2-})$ | $2.5 \times 10^4$ ,<br>$4.78 \times 10^4$         | 0.12/0.08                              | water | S8        |
| 9  | $\{[\text{Tb}(\text{TATAB})(\text{H}_2\text{O})_2] \cdot \text{NMP} \cdot \text{H}_2\text{O}\}_n$                                  | $\text{Cr}_2\text{O}_7^{2-}$                     | 11 106                                            | 5                                      | water | S9        |
| 10 | $[\text{Eu}_2(\text{tpbpc})_4 \cdot \text{CO}_3 \cdot \text{H}_2\text{O}] \cdot \text{DMF} \cdot \text{solvent}$                   | $\text{CrO}_4^{2-}$                              | $4.85 \times 10^3$                                | 0.33                                   | water | S10       |
| 11 | $[\text{Cd}(\mu_3\text{-Hcpboda})(1,4\text{-bib})]_n$                                                                              | $(\text{Cr}_2\text{O}_7^{2-}/\text{CrO}_4^{2-})$ | $1.62 \times 10^4$ ,<br>$7.61 \times 10^3$        | 2.29/3.91                              | water | This work |
| 12 | $\{[\text{Cd}_3(\mu_4\text{-cpboda})_2(\mu_{1,1}\text{-OH}_2)_2(\text{phen})_2] \cdot 2\text{DMF} \cdot 1.5\text{H}_2\text{O}\}_n$ | $(\text{Cr}_2\text{O}_7^{2-}/\text{CrO}_4^{2-})$ | $1.38 \times 10^4$ ,<br>$1.43 \times 10^4$        | 4.27/4.4                               | water |           |

$\text{H}_2\text{btz}$  = 1,5-bis(5-tetrazolo)-3-oxapentane;  $\text{H}_3\text{ttz}$  = 1,2,3-tris-[2-(5-tetrazolo)-ethoxy]propane; L = 3-pyridylcarbonyl-aldehyde nicotinoylhydrazone;  $\text{H}_2\text{IPA}$  = isophthalic acid; TPOM = tetrakis(4-pyridyloxymethylene)methane,  $\text{NH}_2\text{-BDC}$  = 2-aminoterephthalic acid;  $\text{H}_2\text{CBIP}$  = 5-((2'-cyano-[1,1'-biphenyl]-4-yl)methoxy)isophthalic acid; 4-tkpnb = 1,2,4,5-tetrakis(4-pyridylvinyl)benzene; 5-tert-H2BIPA = 5-tert-butyl-isophthalic acid.  $\text{H}_3\text{TATAB}$  = 4,4',4''-s-triazine-1,3,5-triyltri-m-aminobenzoic acid, NMP = N-methyl-2-pyrrolidone; Htpbpc = 4-[4,2;6,4]-terpyridin-4-yl-biphenyl-4-carboxylic acid.

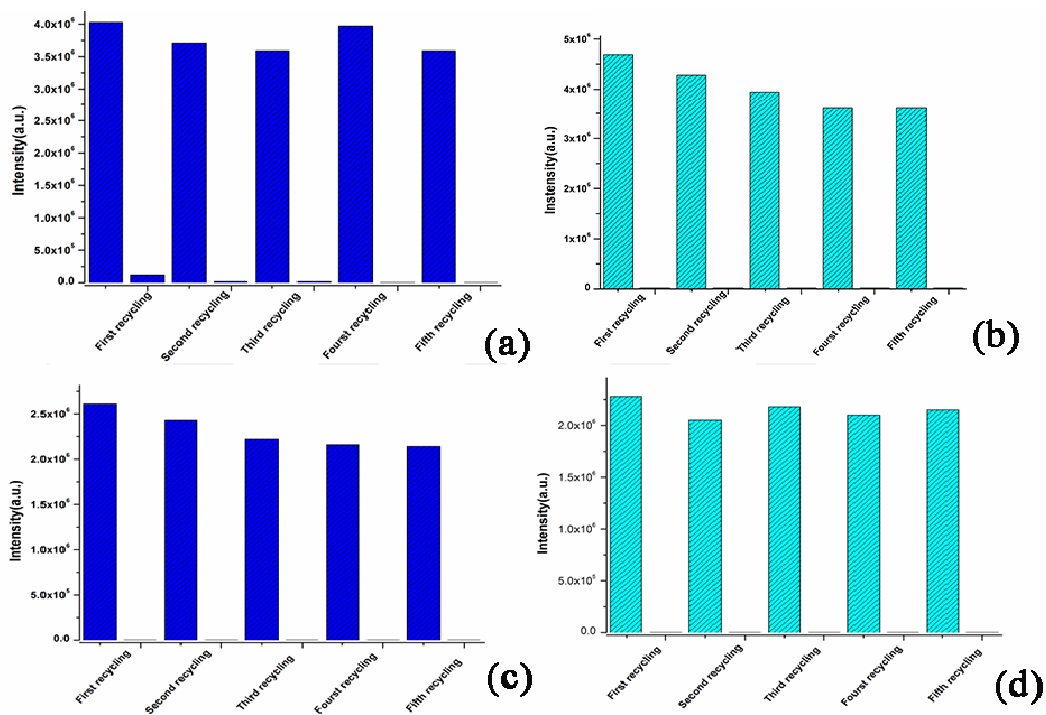

**Fig. S7** The luminescence intensity of complex **4** and **5** for the recognition of  $\text{Cr}_2\text{O}_7^{2-}$  (a) in **4**, (c) in **5**,  $\text{CrO}_4^{2-}$  (b) in **4**, (d) in **5**, after five recycling processes .

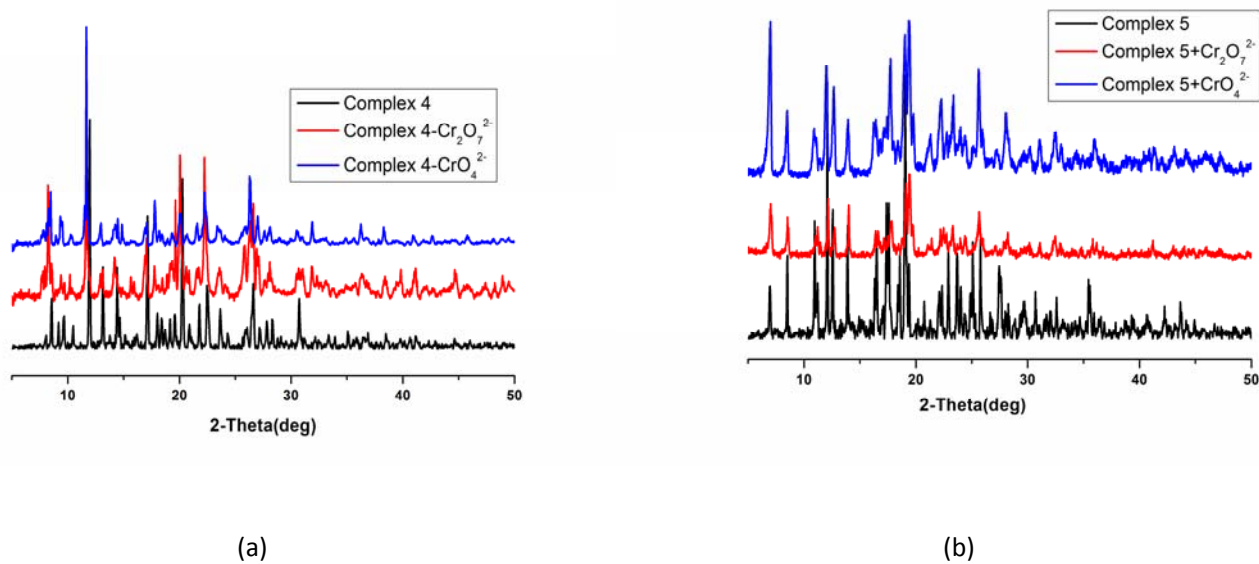

**Fig. S8** The PXRD patterns of simulated complexes **4** and **5** , the PXRD patterns of **4** and **5** for the recognition of  $\text{Cr}_2\text{O}_7^{2-}$  and  $\text{CrO}_4^{2-}$  after five recycling processes

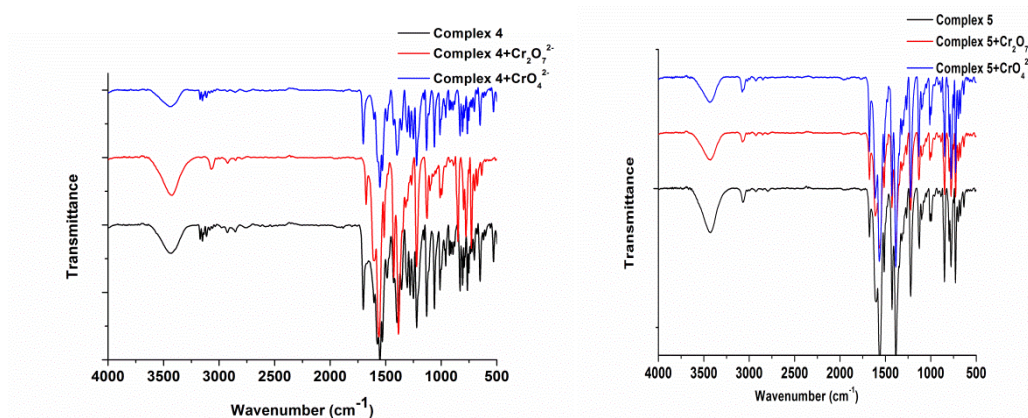

(a)

(b)

**Fig. S9** The IR spectra of complexes **4** and **5**, the IR spectra of **4** and **5** for the recognition of Cr<sub>2</sub>O<sub>7</sub><sup>2-</sup> and CrO<sub>4</sub><sup>2-</sup> after five recycling processes

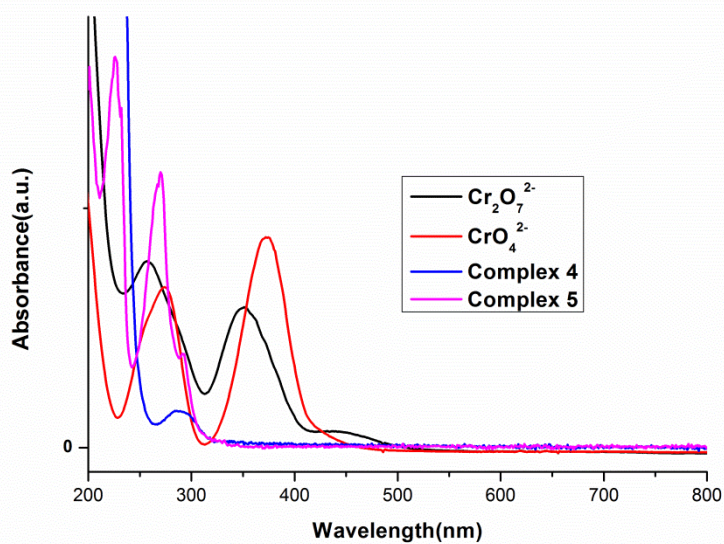

**Fig. S10** Liquid UV-vis spectra of complexes **4** and **5**, Cr<sub>2</sub>O<sub>7</sub><sup>2-</sup> and CrO<sub>4</sub><sup>2-</sup> in the aqueous solution

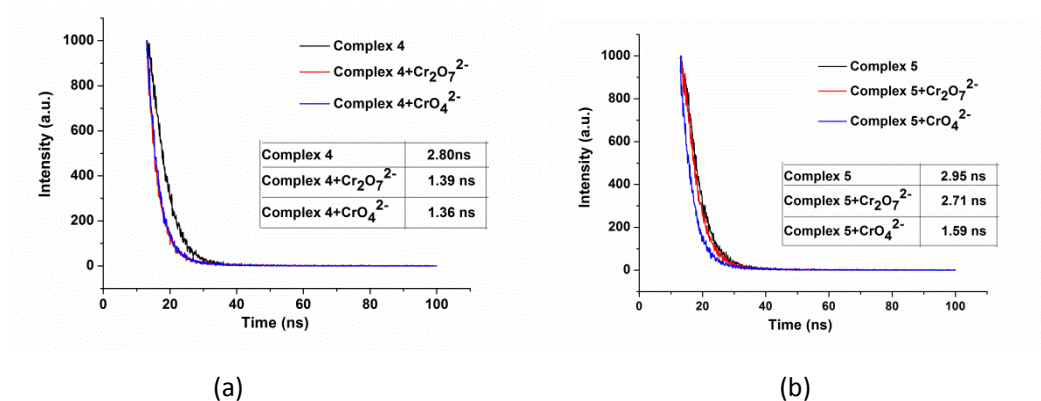

**Fig. S11** The luminescence decay lifetimes of the complexes **4**, **5** and Cr<sup>VI</sup> treated materials.

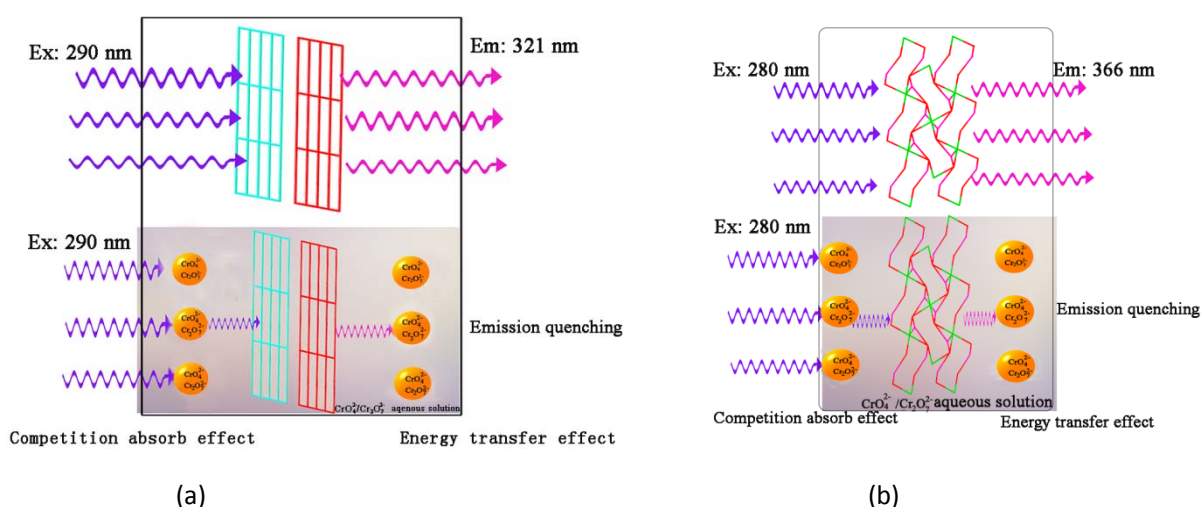

**Figure. S12** The possible quenching mechanism for detecting Cr<sub>2</sub>O<sub>7</sub><sup>2-</sup>/CrO<sub>4</sub><sup>2-</sup> by complexes **4** (a) and **5** (b).<sup>S11</sup>

## References

- S1 R. Lv, J. Wang, Y. Zhang, H. Li, L. Yang, S. Liao, W. Gu and X. Liu, *Journal of Materials Chemistry A*, 2016, **4**, 15494-15500.
- S2 B. Joarder, A. V. Desai, P. Samanta, S. Mukherjee and S. K. Ghosh, *Chemistry*, 2015, **21**, 965-969.
- S3 C-S. Cao, H.-C. Hu, H. Xu, W.-Z. Qiao, and B. Zhao, *CrystEngComm*, 2016, **18**, 4445.
- S4 B. Parmar, Y. Rachuri, K.K. Bisht, R. Laiya, and E. Suresh, *Inorg. Chem.*, 2017, **56**, 2627.
- S5 W. Liu, X. Huang, C. Xu, C. Chen, L. Yang, W. Dou, W. Chen, H. Yang and W. Liu, *Chemistry*, 2016, **22**, 18769-18776.
- S6 R. Lv, J. Wang, Y. Zhang, H. Li, L. Yang, S. Liao, W. Gu and X. Liu, *Journal of Materials Chemistry A*, 2016, **4**, 15494-15500.
- S7 Z. Sun, M. Yang, Y. Ma and L. Li, *Cryst. Growth.Des.*, 2017, **17**, 4326.
- S8 W. J. Gong, R. Yao, H. X. Li, Z. G. Ren, J. G. Zhang and J. P. Lang, *Dalton Trans.*, 2017, **46**, 16861.
- S9 G. X. Wen, M. L. Han, X. Q. Wu, Y. P. Wu, W. W. Dong, J. Zhao, D. S. Li and L. F. Ma, *Dalton transactions*, 2016, **45**, 15492-15499.

- S10. J. Liu, G. Ji, J. Xiao, and Z. Liu, *Inorg. Chem.*, 2017, **56**, 4197.
- S11 G.-Y. L, Z. Q. Yao, J. Xu, T.L. Hu, X. H. Bu, *Chem. Eur. J*, 2018, **24**, 3192–3198.
